# Supplementary material for: Genome-wide association study using deregressed breeding values for cryptorchidism and scrotal/inguinal hernia in two pig lines
Source: PubMed Central journal article supplement (PMC4367917; doi:10.1186/s12711-015-0096-6), 2015-03-21
Supplement: 12711_2015_96_MOESM1_ESM.pdf [file 12711_2015_96_MOESM1_ESM.pdf]

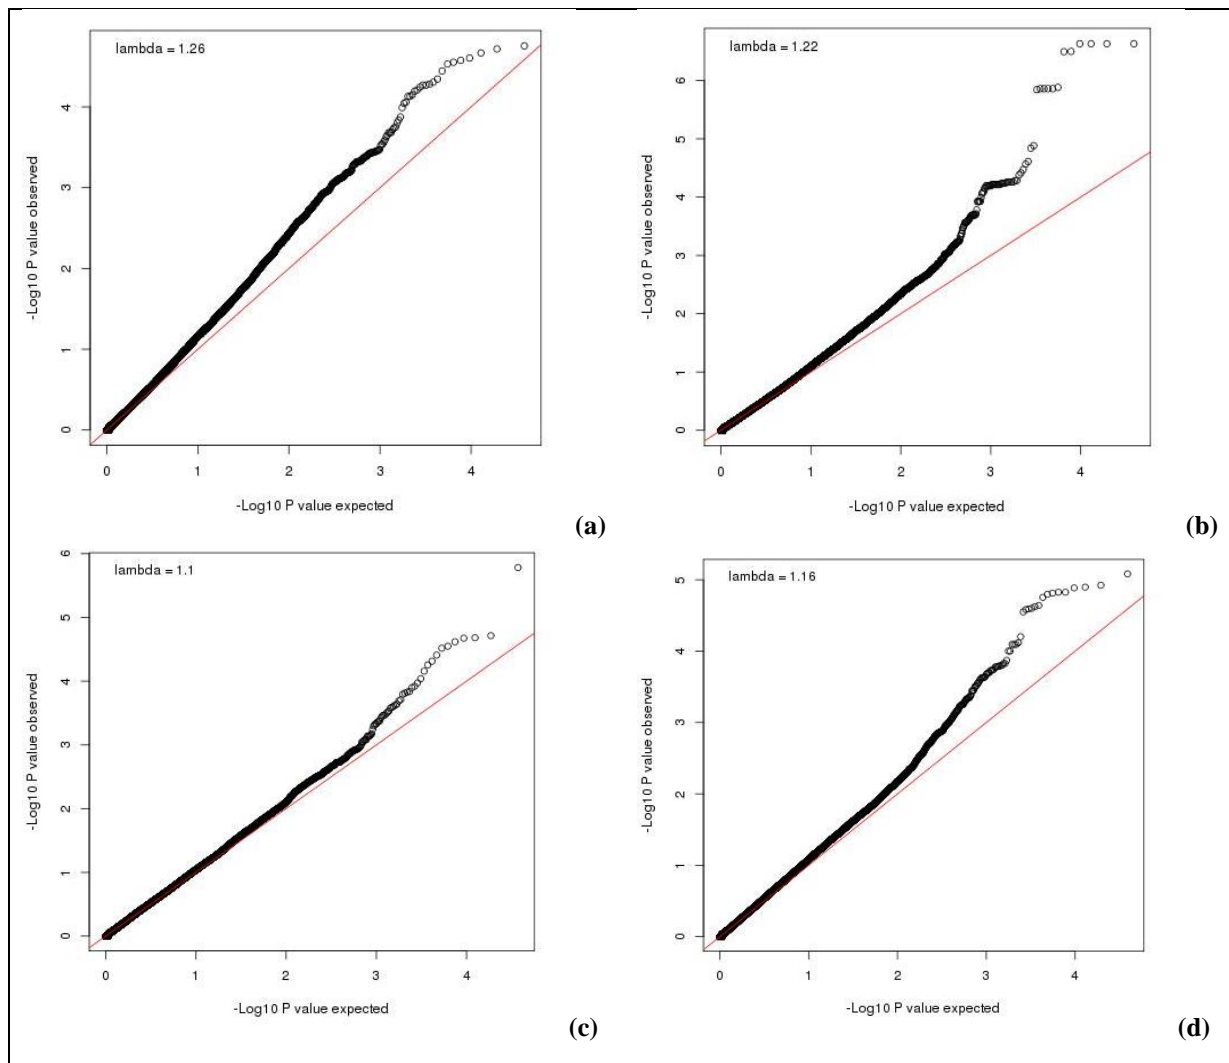

**Quantile-quantile plots for cryptorchidism in Large White (a), for cryptorchidism in Landrace (b), for hernia in Large White (c), and for hernia in Landrace (d).** Observed distribution of  $-\log_{10}(\text{P-values})$  on the y-axis compared to the expected distribution of  $-\log_{10}(\text{P-values})$  on the x-axis across the 38 632 and 39 508 SNPs for Large White and Landrace, respectively.
